# Supplementary material
Source: PubMed Central journal article supplement (PMC5764126)
Supplement: jgv-97-2883-s001.pdf [file jgv-97-2883-s001.pdf]

# Supplemental Figure 1

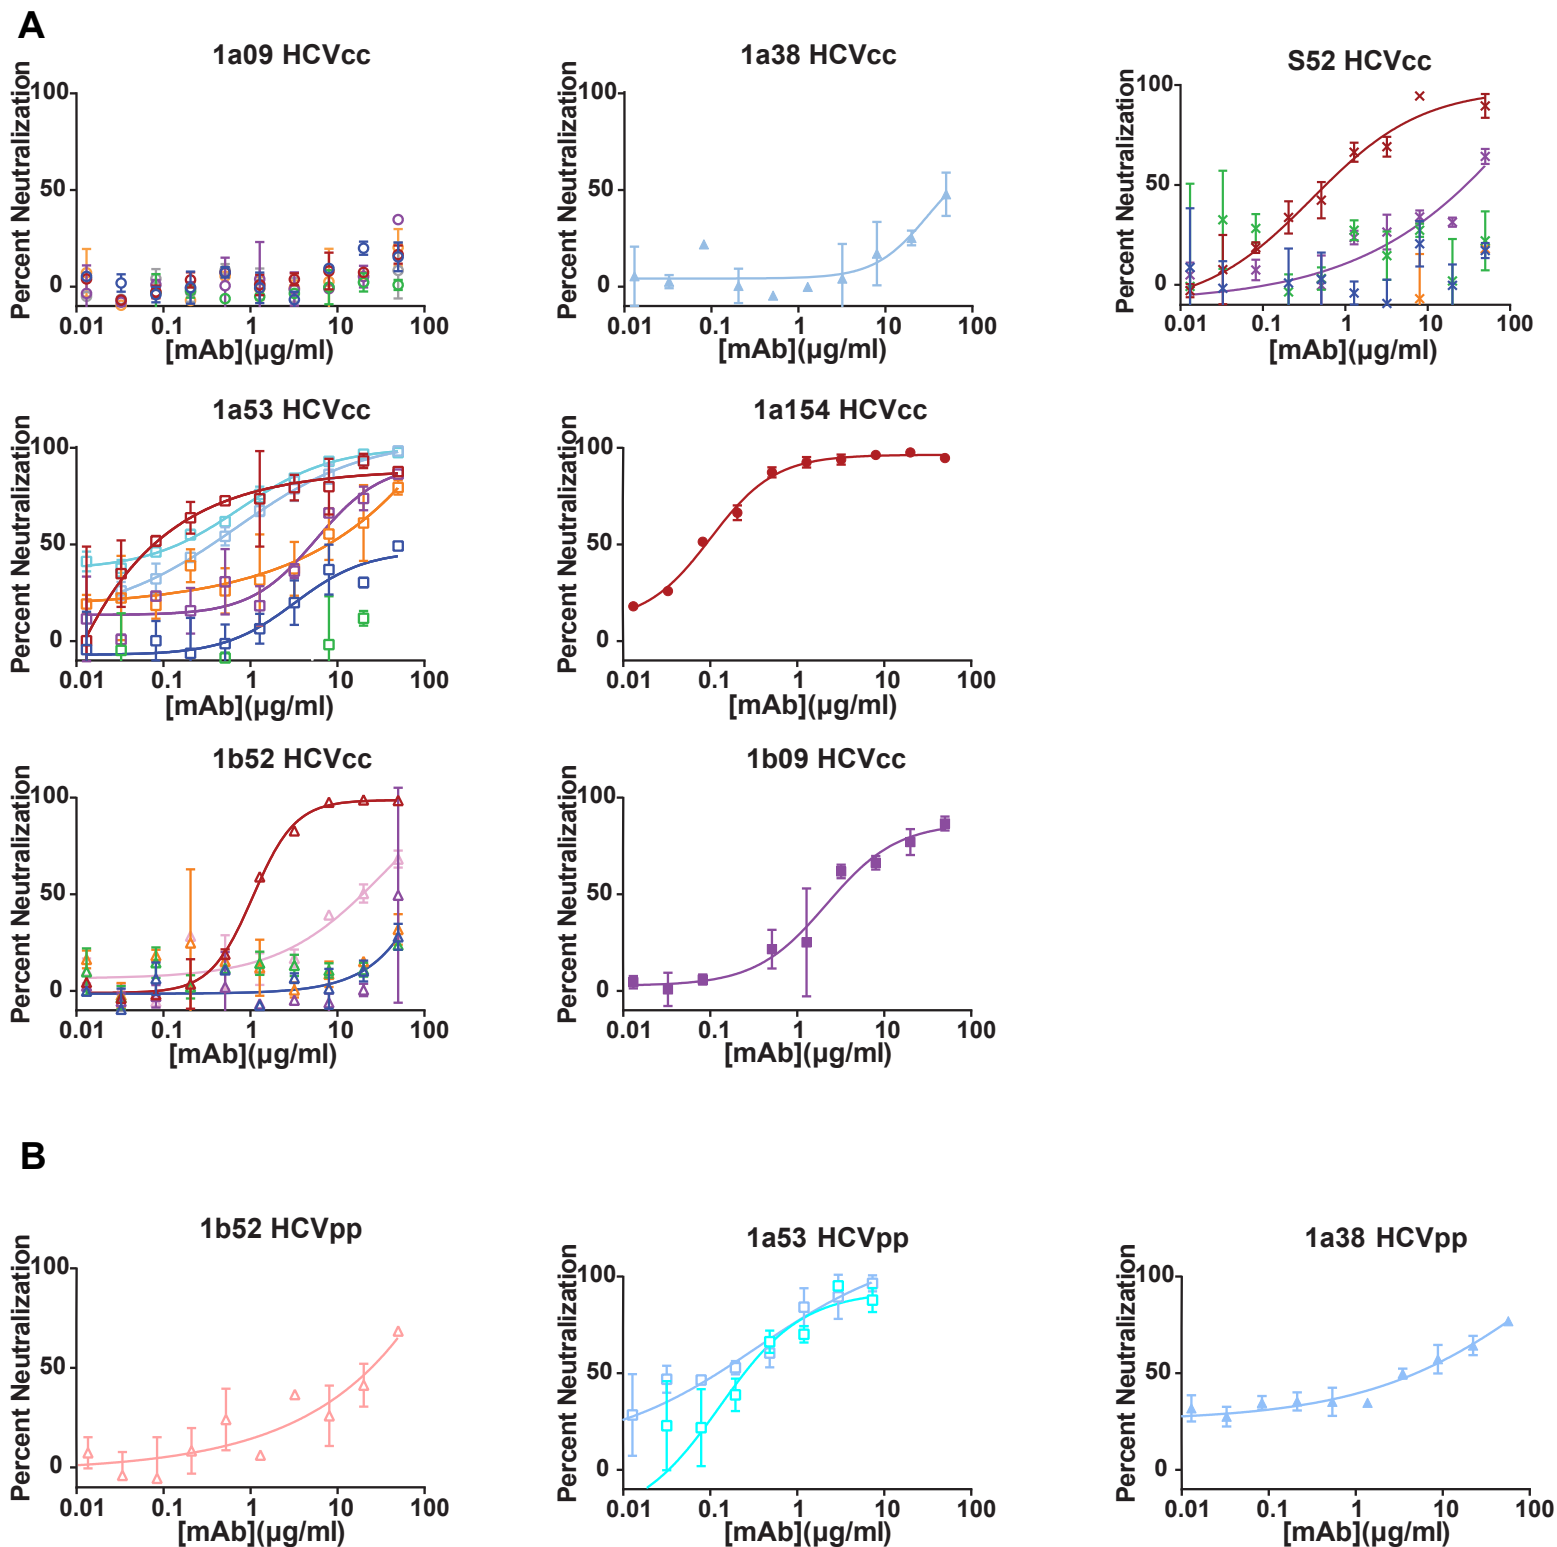

**All HCVcc and HCVpp neutralization curves not shown in Figure 4.** (A) Patient-derived E1E2 sequences were cloned into full-length replication competent HCV (HCVcc). HCVcc viral supernatants were tested in duplicate for neutralization sensitivity to serial dilutions of up to 7 mAbs or IgG. Colors indicate mAb tested (dark blue=CBH5, red=HC84.26, green=HC84.22, purple=HC33.4, orange=AR3A, light blue=AR4A, cyan=AR3C, pink=AR5A). Error bars indicate standard deviations. (B) Patient-derived E1E2 sequences were used to generate HCVpp. HCVpp were tested in duplicate for neutralization sensitivity to serial dilutions of 1-2 mAbs or IgG. Colors indicate mAb tested (light blue=AR4A, cyan=AR3C, pink=AR5A). Error bars indicate standard deviations.

## Supplemental Figure 2

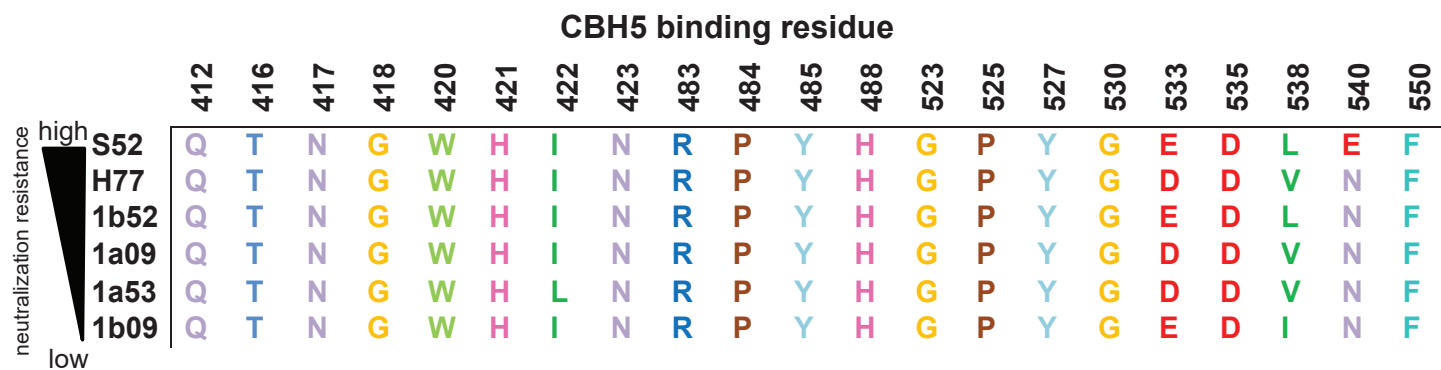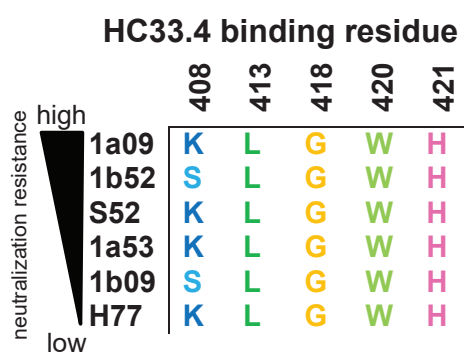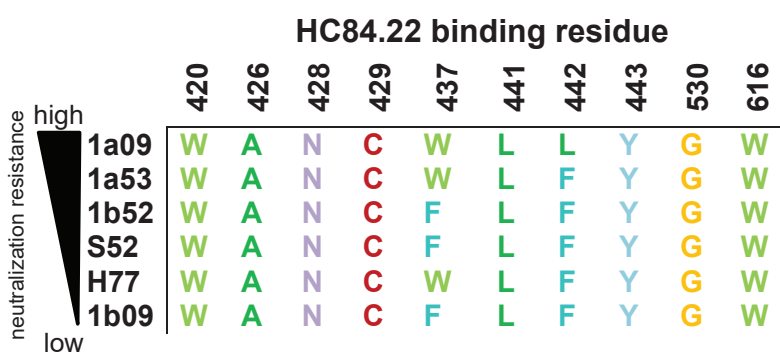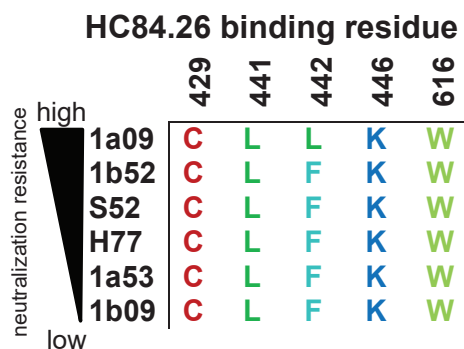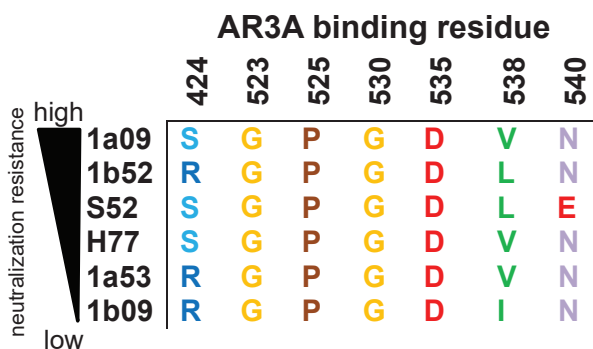

**Comparison of mAb binding residues of HCVcc variants.** Five mAbs were tested for neutralizing activity against multiple HCVcc variants. HCVcc variants are listed in descending order from highest to lowest neutralization resistance as determined by IC<sub>50</sub>. Amino acids present in each HCVcc variant at previously identified binding residues for each mAb are represented using standard IUPAC abbreviations.

**Supplemental Table 1** HCVcc and HCVpp specific infectivity measurements

## HCVcc specific infectivity

|       | <b>IU/mL</b> | <b>SFU/mL<br/>(rep1)</b> | <b>SFU/mL<br/>(rep2)</b> | <b>SFU/IU<br/>(rep1)</b> | <b>SFU/IU<br/>(rep2)</b> | <b>Average<br/>SFU/IU</b> |
|-------|--------------|--------------------------|--------------------------|--------------------------|--------------------------|---------------------------|
| 1a01  | 1.32E+05     | 1.33E+04                 | 8.88E+03                 | 1.01E-01                 | 6.73E-02                 | 8.42E-02                  |
| 1a09  | 1.38E+05     | 1.40E+04                 | 5.64E+03                 | 1.02E-01                 | 4.09E-02                 | 7.13E-02                  |
| 1a22  | 1.87E+05     | 1.04E+04                 | 8.96E+03                 | 5.53E-02                 | 4.78E-02                 | 5.15E-02                  |
| 1a38  | 9.86E+04     | 9.76E+03                 | 5.06E+03                 | 9.90E-02                 | 5.13E-02                 | 7.52E-02                  |
| 1a53  | 8.13E+04     | 1.02E+04                 | 1.41E+04                 | 1.25E-01                 | 1.74E-01                 | 1.49E-01                  |
| 1a72  | 1.01E+05     | 1.08E+04                 | 7.92E+03                 | 1.07E-01                 | 7.85E-02                 | 9.28E-02                  |
| H77   | 2.27E+05     | 2.04E+03                 | 1.24E+04                 | 8.99E-03                 | 5.46E-02                 | 3.18E-02                  |
| 1a157 | 5.50E+05     | 3.72E+04                 | 2.81E+04                 | 6.76E-02                 | 5.11E-02                 | 5.93E-02                  |
| 1b09  | 2.32E+04     | 3.30E+03                 | 4.84E+03                 | 1.42E-01                 | 2.08E-01                 | 1.75E-01                  |
| 1b20  | 3.96E+04     | 1.24E+04                 | 4.03E+04                 | 3.13E-01                 | 1.02E+00                 | 6.66E-01                  |
| 1b52  | 2.39E+05     | 2.29E+04                 | 9.66E+03                 | 9.58E-02                 | 4.04E-02                 | 6.81E-02                  |
| 1b58  | 2.86E+04     | 7.28E+03                 | 2.06E+04                 | 2.55E-01                 | 7.19E-01                 | 4.87E-01                  |

## HCVpp specific infectivity

|       | <b>IU/mL<br/>(rep1)</b> | <b>IU/mL<br/>(rep2)</b> | <b>RLU/mL<br/>(rep1)</b> | <b>RLU/mL<br/>(rep2)</b> | <b>RLU/IU<br/>(rep1)</b> | <b>RLU/IU<br/>(rep2)</b> | <b>Average<br/>RLU/IU</b> |
|-------|-------------------------|-------------------------|--------------------------|--------------------------|--------------------------|--------------------------|---------------------------|
| 1a01  | 9.32E+09                | 9.74E+09                | 9.62E+07                 | 1.39E+08                 | 1.03E-02                 | 1.42E-02                 | 1.23E-02                  |
| 1a09  | 9.30E+09                | 1.67E+10                | 1.63E+08                 | 2.52E+08                 | 1.76E-02                 | 1.51E-02                 | 1.63E-02                  |
| 1a22  | 8.13E+09                | 1.18E+10                | 2.16E+07                 | 2.65E+07                 | 2.66E-03                 | 2.26E-03                 | 2.46E-03                  |
| 1a38  | 6.75E+09                | 8.97E+09                | 4.95E+08                 | 7.60E+08                 | 7.33E-02                 | 8.47E-02                 | 7.90E-02                  |
| 1a53  | 1.01E+10                | 1.58E+10                | 1.61E+07                 | 3.45E+07                 | 1.60E-03                 | 2.18E-03                 | 1.89E-03                  |
| 1a72  | 1.14E+10                | 1.46E+10                | 1.00E+08                 | 1.74E+08                 | 8.82E-03                 | 1.19E-02                 | 1.04E-02                  |
| H77   | 7.60E+09                | 5.83E+09                | 7.10E+07                 | 7.49E+07                 | 9.34E-03                 | 1.29E-02                 | 1.11E-02                  |
| 1a157 | 1.63E+10                | 2.55E+09                | 3.53E+07                 | 4.16E+07                 | 2.17E-03                 | 1.63E-02                 | 9.26E-03                  |
| 1b09  | 5.53E+09                | 3.12E+09                | 1.50E+08                 | 2.70E+08                 | 2.72E-02                 | 8.68E-02                 | 5.70E-02                  |
| 1b20  | 1.47E+10                | 4.30E+09                | 5.76E+07                 | 1.20E+08                 | 3.92E-03                 | 2.79E-02                 | 1.59E-02                  |
| 1b52  | 6.08E+09                | 5.39E+09                | 3.01E+08                 | 3.12E+08                 | 4.95E-02                 | 5.79E-02                 | 5.37E-02                  |
| 1b58  | 6.71E+09                | 1.16E+10                | 4.79E+07                 | 4.84E+07                 | 7.15E-03                 | 4.17E-03                 | 5.66E-03                  |
